# Supplementary material
Source: publisher site journal article supplement (https://www.dovepress.com/article/605382)
Supplement: Supplementary file 1 [file 605382%20Revised%20Supplementary%20Material.docx]

**Supplementary table 1** The sIgE levels of Der p, Der f and Der p components

|  | Grade | Cases (%) |  | Grade | Cases (%) |
| --- | --- | --- | --- | --- | --- |
| Der p | 0 | 0 (0.00) | Der f | 0 | 0 (0.00) |
|  | 1 | 0 (0.00) |  | 1 | 0 (0.00) |
|  | 2 | 4 (1.91) |  | 2 | 4 (1.91) |
|  | 3 | 17 (8.13) |  | 3 | 13 (6.22) |
|  | 4 | 74 (35.41) |  | 4 | 55 (26.32) |
|  | 5 | 47 (22.49) |  | 5 | 50 (23.92) |
|  | 6 | 67 (32.06) |  | 6 | 87 (41.63) |
| Der p 1 | 0 | 8 (3.83) | Der p 10 | 0 | 190 (90.91) |
|  | 1 | 0 (0.00) |  | 1 | 8 (3.83) |
|  | 2 | 4 (1.91) |  | 2 | 7 (3.35) |
|  | 3 | 50 (23.92) |  | 3 | 3 (1.43) |
|  | 4 | 80 (38.28) |  | 4 | 1 (0.48) |
|  | 5 | 29 (13.88) |  | 5 | 0 (0.00) |
|  | 6 | 38 (18.18) |  | 6 | 0 (0.00) |
| Der p 2 | 0 | 25 (11.96) | Der p 23 | 0 | 91 (43.55) |
|  | 1 | 2 (0.96) |  | 1 | 4 (1.91) |
|  | 2 | 3 (1.44) |  | 2 | 33 (15.79) |
|  | 3 | 17 (8.13) |  | 3 | 50 (23.92) |
|  | 4 | 47 (22.49) |  | 4 | 23 (11.00) |
|  | 5 | 53 (25.36) |  | 5 | 5 (2.40) |
|  | 6 | 62 (29.66) |  | 6 | 3 (1.43) |

**Supplementary table 2** Comparison of serum IgE in children with AR and/or AS

|  | AR (*n*=125)  Median (Q1, Q3) | AR with AS (*n*=84)  Median (Q1, Q3) | *Z* value | *P* value |
| --- | --- | --- | --- | --- |
| Der p 1 sIgE | 25.57  (12.10, 52.47) | 40.13  (18.66, 99.69) | -2.28 | 0.02 |
| Der p 2 sIgE | 50.02  (19.30, 100.00) | 68.33  (30.31, 100.00) | -1.56 | 0.12 |
| Der p 10 sIgE | 0.10 (0.10, 0.10) | 0.10 (0.10, 0.10) | -0.94 | 0.35 |
| Der p 23 sIgE | 0.79  (0.10, 6.44) | 3.10  (0.10, 10.38) | -1.69 | 0.09 |
| Der p (1+2) sIgE | 82.13  (42.09, 142.79) | 104.47  (53.15, 177.39) | -2.25 | 0.02 |
| tIgE | 445.00  (230.00, 908.00) | 700.50  (395.75, 1251.00) | -2.71 | 0.007 |
| Der p sIgE | 48.00  (27.10, 100.00) | 79.60  (38.20, 100.00) | -2.71 | 0.007 |
| Der f sIgE | 66.40  (34.50, 100.00) | 100.00  (54.08, 100.00) | -2.88 | 0.004 |

*Note*: AR, allergic rhinitis; AS, Asthma.

**Supplementary table 3** Internal validation of the Nomogram

| **Variables** | ***B*** | **Bootstrap (*B*=1000)** | | |
| --- | --- | --- | --- | --- |
| **SE** | ***P* value** | **95%*CI*** |
| Asthma | 1.23 | 0.51 | 0.002 | (0.45,2.41) |
| Der p (1+2) sIgE | 0.01 | 0.004 | ＜0.001 | (0.01,0.02) |
| Der p (1+2) sIgE/tIgE | 7.40 | 2.33 | ＜0.001 | (3.73,12.59) |
